# Supplementary material for: Low levels of HIV test coverage in clinical settings in the UK: a systematic review of adherence to 2008 guidelines
Source: PubMed Central journal article supplement (PMC3945742; doi:10.1136/sextrans-2013-051312), 2014-01-10
Supplement: sextrans-2013-051312-s1.pdf [file sextrans-2013-051312-s1.pdf]

**Appendix a: Classification of settings and populations for routine HIV testing (adapted from national testing guidelines, BHIVA 2008) [6]**

|                                                                                     |                                                                                                                                                                                                                                                                                                                                                                                                                                                                                                                                                                                                                                                                                                                                                                                                                                                                                                                                                                                                                                                                                                                                                                                                                                                                                                                                                                                                                                                                                                                                                                                                                                                                                                                                 |
|-------------------------------------------------------------------------------------|---------------------------------------------------------------------------------------------------------------------------------------------------------------------------------------------------------------------------------------------------------------------------------------------------------------------------------------------------------------------------------------------------------------------------------------------------------------------------------------------------------------------------------------------------------------------------------------------------------------------------------------------------------------------------------------------------------------------------------------------------------------------------------------------------------------------------------------------------------------------------------------------------------------------------------------------------------------------------------------------------------------------------------------------------------------------------------------------------------------------------------------------------------------------------------------------------------------------------------------------------------------------------------------------------------------------------------------------------------------------------------------------------------------------------------------------------------------------------------------------------------------------------------------------------------------------------------------------------------------------------------------------------------------------------------------------------------------------------------|
| <p><b>Persons diagnosed with a disease indicative of HIV infection</b></p>          | <p>Tuberculosis<br/> Pneumocystis<br/> Cerebral toxoplasmosis<br/> Primary Cerebral Lymphoma<br/> Cryptococcal meningitis<br/> Progressive multifocal leucoencephalopathy<br/> Kaposi's sarcoma<br/> Persistent cryptosporidiosis<br/> Non-Hodgkin's Lymphoma<br/> Cervical Cancer<br/> Cytomeglovirus retinitis<br/> Bacterial pneumonia<br/> Aspergillosis<br/> Aseptic meningitis/encephalitis<br/> Cerebral abscess<br/> Space occupying lesion of unknown cause<br/> Guillain-Barré syndrome<br/> Transverse myelitis<br/> Peripheral neuropathy<br/> Dementia<br/> Leucoencephalopathy<br/> Severe or recalcitrant seborrhoeic dermatitis<br/> Severe or recalcitrant psoriasis<br/> Multidermatomal or recurrent herpes zoster<br/> Oral candidiasis<br/> Oral hairy leukoplakia<br/> Chronic diarrhoea of unknown cause<br/> Weight loss of unknown cause<br/> Salmonella, shigella or campylobacter<br/> Hepatitis B infection<br/> Hepatitis C infection<br/> Anal cancer or anal intraepithelial dysplasia<br/> Lung cancer<br/> Seminoma<br/> Head and neck cancer<br/> Hodgkin's lymphoma<br/> Castleman's disease<br/> Vaginal intraepithelial neoplasia<br/> Cervical intraepithelial neoplasia (Grade 2 or above)<br/> Any unexplained blood dyscrasia including:<br/> Thrombocytopenia<br/> Neutropenia<br/> Lymphopenia<br/> Infective retinal disease including herpesviruses and toxoplasma<br/> Any unexplained retinopathy<br/> Lymphadenopathy of unknown cause<br/> Chronic parotitis<br/> Lymphoepithelial parotid cysts<br/> Mononucleosis-like syndrome (primary HIV infection)<br/> Pyrexia of unknown origin<br/> Any lymphadenopathy of unknown cause<br/> Any sexually transmitted infection</p> |
| <p><b>Persons attending a service where routine HIV screening is undertaken</b></p> | <p>Termination of pregnancy services<br/> Drug dependency programmes<br/> All patients presenting for healthcare where HIV prevalence</p>                                                                                                                                                                                                                                                                                                                                                                                                                                                                                                                                                                                                                                                                                                                                                                                                                                                                                                                                                                                                                                                                                                                                                                                                                                                                                                                                                                                                                                                                                                                                                                                       |

|                                               |                                                                                                                                                                                                                                                             |
|-----------------------------------------------|-------------------------------------------------------------------------------------------------------------------------------------------------------------------------------------------------------------------------------------------------------------|
| <b>(excluding GUM and antenatal services)</b> | All men and women registering in general practice where diagnosed HIV prevalence in the local population exceeds 2 in 1000 population<br>All general medical admissions where diagnosed HIV prevalence in the local population exceeds 2 in 1000 population |
|-----------------------------------------------|-------------------------------------------------------------------------------------------------------------------------------------------------------------------------------------------------------------------------------------------------------------|

Appendix b: Characteristics of Studies Included: Methods, Measures and Testing Levels

| Author                                                       | Risk group                                                                                                                                                                                          | Setting<br>(diagnosed HIV<br>prevalence per 1,000<br>population 15-59<br>year olds) *                                     | Methods                                                                    | Number<br>eligible<br>to test | Number<br>offered<br>test | Number<br>tested | Number<br>testing<br>positive |
|--------------------------------------------------------------|-----------------------------------------------------------------------------------------------------------------------------------------------------------------------------------------------------|---------------------------------------------------------------------------------------------------------------------------|----------------------------------------------------------------------------|-------------------------------|---------------------------|------------------|-------------------------------|
| Persons diagnosed with a disease indicative of HIV infection |                                                                                                                                                                                                     |                                                                                                                           |                                                                            |                               |                           |                  |                               |
| Gupta, N.D. & Lechelt, M. (2011) [1]                         | Inpatients with indicator diseases (tuberculosis, hepatitis B, hepatitis C, cervical intraepithelial neoplasia (grade I/II), lymphoma, anal cancer, seminoma, aspergillosis or Castleman's disease) | South-west Essex (1.28)                                                                                                   | Electronic record audit of attendees attending one secondary care hospital | 557                           | 33                        | 33               | Not reported                  |
| Thomas William, S., <i>et al.</i> (2011) [2]                 | Patients with indicator disease (tuberculosis)                                                                                                                                                      | Birmingham and Solihull (Birmingham East & North; 1.5, Heart of Birmingham; 3.29, South Birmingham; 1.66; Solihull; 0.58) | Retrospective audit                                                        | 194                           | Not reported              | 91               | Not reported                  |
| Hsu, D., <i>et al.</i> (2012) [3]                            | Primary care patients presenting with glandular fever-like illness                                                                                                                                  | South London (Lambeth 13.28, Southwark; 10.29)                                                                            | Retrospective audit of patients attending 72 primary care clinics          | 1045                          | Not reported              | 118              | 3                             |
| Page, I., <i>et al.</i> (2011) [4]                           | Patients with indicator disease (tuberculosis, hepatitis B, hepatitis C, lymphoma)                                                                                                                  | Blackpool (3.41)                                                                                                          | Retrospective audit of patients attending one secondary care hospital      | 156                           | Not reported              | 32               | Not reported                  |
| Thomson-Glover, R., <i>et al.</i> (2011) [5]                 | Patients with indicator disease (hepatitis B, hepatitis C, candida)                                                                                                                                 | Warrington (0.6)                                                                                                          | Case-note audit of patients attending two secondary care hospitals         | 249                           | Not reported              | 15               | 0                             |

|                                                                         |                                                                                                 |                                            |                                                                                                 |      |              |      |              |  |
|-------------------------------------------------------------------------|-------------------------------------------------------------------------------------------------|--------------------------------------------|-------------------------------------------------------------------------------------------------|------|--------------|------|--------------|--|
|                                                                         | stomatitis)                                                                                     |                                            |                                                                                                 |      |              |      |              |  |
| Thorburn, F. (2012) [6]                                                 | Patients with indicator disease (diagnosed with tuberculosis)                                   | Glasgow (1.7)                              | Retrospective case-note review of TB patients attending one tertiary care clinic                | 338  | Not reported | 221  | 9            |  |
| Vas, A., <i>et al.</i> (2012) [7]                                       | Patients with indicator disease (tuberculosis, hepatitis B, hepatitis C)                        | Manchester (5.22)                          | Retrospective case-note review of patients attending one secondary care hospital                | 91   | 13           | 9*   | Not reported |  |
| Byrne, L., <i>et al.</i> (2011) [8]                                     | Patients admitted to acute medical unit with community-acquired pneumonia                       | London (Newham; 8.12, Tower Hamlets; 5.94) | Retrospective case-note review of patients attending one acute medical admissions unit          | 43   | Not reported | 17   | 2            |  |
| Manavi, K., Gautam, N. (2012) [9]                                       | Patients diagnosed with clinical indicator conditions as specified in UK HIV testing guidelines | Birmingham (3.29)                          | Retrospective case note review of patients attending one secondary care hospital                | 967  | Not reported | 97   | 1            |  |
| Dodd, M. <i>et al.</i> (2013) [10]                                      | Patients with an HIV indicator illness in the presenting complaint or past medical history.     | Sheffield (1.4)                            | Retrospective case note review of patients in one General Intensive Care Unit                   | 307  | Not reported | 45   | 3            |  |
| Persons attending recommended testing settings in high prevalence areas |                                                                                                 |                                            |                                                                                                 |      |              |      |              |  |
| Burns, F., <i>et al.</i> (2012) [11]                                    | Acute medical admissions                                                                        | London (5.24)                              | Prospective, consecutive HIV test offer to patients attending one acute medical admissions unit | 606  | 282          | 135  | 3            |  |
| Chan, S.Y., <i>et al.</i> (2011) [12]                                   | Acute medical admissions                                                                        | Croydon (4.45)                             | Prospective offer of HIV test to patients attending one acute medical admissions unit           | 101  | 101          | 84   | 0            |  |
| Rayment, M., <i>et al.</i> (2012) [13]                                  | Acute Care unit and Dermatology outpatient clinic                                               | London (City and Hackney (8.25)            | Prospective study of patients attending one acute care unit                                     | 1223 | 548          | 384  | 4            |  |
| Perry, N., <i>et al.</i> (2011) [14]                                    | Acute medical admissions                                                                        | Brighton & Hove PCT (7.57)                 | Prospective HIV test offer to patients attending one acute medical admissions unit              | 3913 | 1553         | 1413 | 2            |  |
| Bryce, G., (2009) [15]                                                  | Patients newly registering with GP                                                              | Brighton & Hove PCT (7.57)                 | Prospective HIV test offer to patients attending nine primary                                   | 2478 | Not reported | 1473 | 2            |  |

|                                           |                                                   |                                                                                       | care clinics                                                                                     |        |                |      |              |
|-------------------------------------------|---------------------------------------------------|---------------------------------------------------------------------------------------|--------------------------------------------------------------------------------------------------|--------|----------------|------|--------------|
| Ashby, J., <i>et al.</i> (2012) [16]      | Polyclinic attendees in high prevalence area      | West London (Kensington & Chelsea; 8.3, Hammersmith & Fulham; 8.5, Westminster; 7.01) | Prospective study of patients attending one polyclinic                                           | 302    | 93             | 71   | 0            |
| Ellis, S., <i>et al.</i> (2011) [17]      | Acute medical admissions                          | Newcastle Upon Tyne (1.61)                                                            | Prospective audit of patients attending one acute medical admissions unit                        | 3645   | 478            | 396  | 2            |
| Rudran, B., <i>et al.</i> (2011) [18]     | Acute medical admissions                          | Bournemouth and Poole (2.32)                                                          | Retrospective case-note review of patients attending one acute medical admissions unit           | 198    | 3              | 3    | Not reported |
| Leber, W., <i>et al.</i> (2012) [19]      | Patients newly registering with GP                | Hackney (8.25)                                                                        | Cluster randomised control trial of patients attending 40 primary care units                     | 28274  | 6607           | 3213 | 7            |
| Bassett, D., <i>et al.</i> (2012) [20]    | Acute medical admissions                          | Manchester (5.22)                                                                     | Prospective case-note review of patients attending one acute medical admissions                  | 429    | 134            | 117  | Not reported |
| Rosenvinge, M., <i>et al.</i> (2010) [21] | Women attending termination of pregnancy services | Wandsworth (4.91)                                                                     | Retrospective review of HIV testing of patients who attended two termination of pregnancy clinic | 870    | 844            | 702  | 1            |
| Garrard, N., <i>et al.</i> (2010) [22]    | Women attending termination of pregnancy service  | Southwark (10.39) and Lambeth (13.28)                                                 | Prospective, consecutive test offer to patients attending one termination of pregnancy clinic    | 2,831  | Not reported   | 972  | 5            |
| Barbour, A., <i>et al.</i> (2012) [23]    | Patients admitted to acute medical admissions     | Croydon (4.45)                                                                        | Prospective intervention at one acute medical unit                                               | 3709   | Not reported** | 1390 | 7            |
| Rycroft, J., <i>et al.</i> (2012) [24]    | Acute medical admissions                          | Greenwich (5.58)                                                                      | Retrospective audit of patients who attended one acute medical admissions                        | 970    | Not reported   | 43   | 3            |
| Page, I., <i>et al.</i> (2011) [4]        | Acute medical admissions                          | Blackpool (3.41)                                                                      | Retrospective audit of patients who attended one secondary care hospital                         | 13,999 | Not reported   | 72   | Not reported |

|                                           |                                    |                                                     |                                                                     |        |              |      |    |
|-------------------------------------------|------------------------------------|-----------------------------------------------------|---------------------------------------------------------------------|--------|--------------|------|----|
| French, S., <i>et al.</i> (2012) [25]     | Patients newly registering with GP | Southwark (10.39), Lewisham (7.03), Lambeth (13.28) | Prospective study of patients attending 13 primary care clinics     | 16,241 | 6405         | 3229 | 12 |
| French, S., <i>et al.</i> (2012) [25]     | Patients newly registering with GP | Southwark (10.39), Lewisham (7.03), Lambeth (13.28) | Prospective study of patients attending 5 primary care clinics      | 6275   | 4925         | 905  | 11 |
| Tillet, S., <i>et al.</i> (2012) [26]     | Acute medical admissions           | Tower Hamlets (5.94)                                | Prospective study of patients attending one secondary care hospital | 1596   | Not reported | 241  | 2  |
| Griffin, A., <i>et al.</i> (2011) [27]    | Patient newly registering with GP  | Manchester (5.22)                                   | Prospective study of patients attending one primary care clinic     | 457    | Not reported | 303  | 2  |
| Palfreeman, A., <i>et al.</i> (2013) [28] | Patients attending admitted to AMU | Leicester (3.22)                                    | Prospective study of patients admitted to AMU                       | 17226  | Not reported | 2542 | 29 |

\* reported for patients diagnosed with TB only. \*\* 77 test refusals were reported. Additional data regarding testing strategy (opt-in vs. opt-out), service model (standard care vs. specific staff training vs. GUM/Health advisor-led testing), and type of HIV test (POCT vs. 4<sup>th</sup> generation serology).

#### Appendix c: Supplementary data tables for studies identified by group

| Study                                                                        | Title                                                                                                                    | Article            | Primary testing outcome                                                        | Exclusions          | Time period (duration)              | Population                                 | Number of centres | Type of centre          | Measure/reporting method      |
|------------------------------------------------------------------------------|--------------------------------------------------------------------------------------------------------------------------|--------------------|--------------------------------------------------------------------------------|---------------------|-------------------------------------|--------------------------------------------|-------------------|-------------------------|-------------------------------|
| <b>Persons diagnosed with a disease indicative of possible HIV infection</b> |                                                                                                                          |                    |                                                                                |                     |                                     |                                            |                   |                         |                               |
| Gupta, N.D. & Lechelt, M. (2011)                                             | Assessment of the implementation and knowledge of the UK national guidelines for HIV testing (2008) in key conditions at | Yes - Audit Report | Electronic departmental record or HIV testing and Electronic pathology records | Non-verifiable data | August 2009 – June 2012 (11 months) | Inpatients at Basildon & Thurrock Hospital | 1                 | Secondary care hospital | Electronic record of HIV test |

|                                    |                                                                                                                                          |                           |                                        |                                                                                                                         |                                        |                                                                       |    |                         |                                       |
|------------------------------------|------------------------------------------------------------------------------------------------------------------------------------------|---------------------------|----------------------------------------|-------------------------------------------------------------------------------------------------------------------------|----------------------------------------|-----------------------------------------------------------------------|----|-------------------------|---------------------------------------|
|                                    | a UK district general hospital                                                                                                           |                           |                                        |                                                                                                                         |                                        |                                                                       |    |                         |                                       |
| Thom as William, S., et al. (2011) | Changes in HIV testing rates among patients with tuberculosis in a large multi-ethnic city in the UK                                     | Yes - Audit Report        | Laboratory database record of HIV test | <18 years, private patients, chemoprophylaxis patients, non-tuberculosis mycobacteria, diagnosis outside catchment area | September 2008 – March 2009 (6 months) | Patients registered on the Birmingham Tuberculosis aftercare register | >1 | Various                 | Laboratory record of HIV test         |
| Hsu, D., et al. (2012)             | Diagnosing HIV infection in patients presenting with glandular fever-like illness in primary care: are we missing primary HIV infection? | Yes - Short Communication | Record of HIV test                     | Not reported                                                                                                            | April 2009 - June 2010 (14 months)     | Primary care patients in Lambeth and Southwark                        | 72 | Primary care clinics    | Laboratory record of HIV test request |
| Page, I., et al. (2011)            | The impact of new national HIV testing guidelines at a district general hospital in an area of high HIV seroprevalence                   | Yes - Paper               | Laboratory record of HIV test          | HIV test requests from GUM clinics                                                                                      | October 2008 – September 2009          | Inpatients in Blackpool                                               | 1  | Secondary care hospital | Laboratory record of HIV test         |

|                                                                                    |                                                                                                 |               |                             |                                                                                                           |                                       |                                                            |   |                               |                                              |
|------------------------------------------------------------------------------------|-------------------------------------------------------------------------------------------------|---------------|-----------------------------|-----------------------------------------------------------------------------------------------------------|---------------------------------------|------------------------------------------------------------|---|-------------------------------|----------------------------------------------|
| <b>Thomson-Glover, R., et al. (2011)</b>                                           | <b>Diagnosing HIV in non-GUM secondary care settings</b>                                        | No - Abstract | Record of HIV test          | not reported                                                                                              | November 2009 - April 2010 (6 months) | inpatients Warrington & Halton hospitals                   | 2 | Secondary care hospitals      | Record of HIV test                           |
| <b>Thornburn, F. (2012)</b>                                                        | <b>The impact of a multi-disciplinary meeting on the rates of HIV in testing in TB patients</b> | No - Abstract | Record of HIV test offer    | not reported                                                                                              | 2010 - 2011 (duration not reported)   | Tuberculosis patients attending virology centre in Glasgow | 1 | Tertiary care clinic          | Laboratory record of HIV test administration |
| <b>Vas, A., et al. (2012)</b>                                                      | <b>HIV testing and in TB and Hepatitis services in a district general hospital</b>              | No - Abstract | Record of HIV test          | not reported                                                                                              | 2009 (duration not reported)          | Indicator disease patients in a Manchester hospital        | 1 | Secondary care hospital       | Record of HIV test administration            |
| <b>Byrne, L., et al. (2011)</b>                                                    | <b>HIV specialists must lead the way to make HIV testing truly routine</b>                      | No-Abstract   | Record of HIV test          | , <18, non-medical specialty, underlying chronic lung disease, hospital-acquired pneumonia                | February - April 2010 (3 months)      | Patients admitted with community-acquired pneumonia        | 1 | Acute medical admissions unit | Case-note record of HIV test administration  |
| <b>Persons attending services where routine HIV screening should be undertaken</b> |                                                                                                 |               |                             |                                                                                                           |                                       |                                                            |   |                               |                                              |
| <b>Chan, S.Y., et al. (2011)</b>                                                   | <b>Acceptance of HIV testing in medical inpatients: A local acceptability study</b>             | Miscellaneous | Consent to have an HIV test | <15 and >59 years, total time admitted <24 hours, assessed as unable to consent, known to be HIV-positive | September 2009 (2 weeks)              | Acute medical admissions in Croydon                        | 1 | Acute medical admissions unit | Offer and acceptance of HIV test             |



|                                   |                                                                                                                                                                      |          |                                          |                                                                                                                        |                                                                        |                                                                                  |   |                                   |                                                                             |
|-----------------------------------|----------------------------------------------------------------------------------------------------------------------------------------------------------------------|----------|------------------------------------------|------------------------------------------------------------------------------------------------------------------------|------------------------------------------------------------------------|----------------------------------------------------------------------------------|---|-----------------------------------|-----------------------------------------------------------------------------|
| <b>Rayment, M., et al. (2012)</b> | <b>HIV Testing in Non-Traditional Settings - the hints study: A multi-centre observational study of feasibility and acceptability.</b>                               | Article  | Offer of HIV test to eligible individual | <16, >65 years, known HIV positive, not accessing healthcare for the first time in testing period, not able to consent | January – September 2010 (12 weeks each site)                          | Patients attending primary and secondary healthcare services in 4 London centres | 4 | Acute care units, Dermatology OPD | Administration of HIV oral fluid or 4 <sup>th</sup> generation HIV serology |
| <b>Perry, N. et al. (2011)</b>    | <b>HIV testing in acute general medical admissions must be universally offered to reduce undiagnosed HIV</b>                                                         | Abstract | Record of HIV test                       | <16 and >79 years, known HIV positive                                                                                  | August 2009 – January 2010 (5 months)                                  | Acute medical admissions in Brighton                                             | 1 | Acute medical admissions unit     | HIV test result                                                             |
| <b>Bryce, G. (2009)</b>           | <b>A study to assess the acceptability, feasibility and cost-effectiveness of universal HIV testing with newly registering patients (aged 16-59) in primary care</b> | Abstract | Acceptance of HIV test offer             | <16 and >59 years                                                                                                      | May - November 2010 (4 months)                                         | Patients attending primary care services in Brighton                             | 9 | Primary care clinics              | HIV POCT test                                                               |
| <b>Ashby, J., et al. (2012)</b>   | <b>HIV testing uptake and acceptability in an inner city polyclinic</b>                                                                                              | Article  | Acceptance of HIV test offer             | <16, >65 years, unable to consent                                                                                      | 2011 dates not specified (random 4-hour duration over a 4 week period) | Polyclinic attendees in west London                                              | 1 | Polyclinic                        | Rapid point-of-care HIV test                                                |

|                                   |                                                                                                                                            |                            |                                       |                                    |                                                                        |                                                    |    |                               |                                                    |
|-----------------------------------|--------------------------------------------------------------------------------------------------------------------------------------------|----------------------------|---------------------------------------|------------------------------------|------------------------------------------------------------------------|----------------------------------------------------|----|-------------------------------|----------------------------------------------------|
| <b>Ellis, S., et al. (2011)</b>   | <b>Offering HIV testing in an acute medical admissions unit in Newcastle upon Tyne</b>                                                     | Clinical Medicine research | Record of HIV test                    | <18 years, no capacity for consent | September - October 2009 (11 weeks) and January - March 2010 (6 weeks) | Acute medical admissions in Newcastle              | 1  | Acute medical admissions unit | HIV test offer and administration                  |
| <b>Rudran, B., et al. (2011)</b>  | <b>HIV testing in acute medical admissions</b>                                                                                             | Abstract                   | Record of HIV test                    | not reported                       | 2010 - exact date not specified (1 week)                               | Acute medical admissions in Bournemouth            | 1  | Acute medical admissions unit | Hospital or laboratory database record of HIV test |
| <b>Leber, W., et al. (2012)</b>   | <b>Can point-of-care HIV testing in primary care increase identification of HIV? The RHIVA 2 Cluster randomised control trial - update</b> | Abstract                   | Offer of rapid point-of-care HIV test | <16 years,                         | May 2010 end date not specified                                        | Patients attending primary care services in London | 40 | Primary care units            | Administration of rapid point-of-care HIV test     |
| <b>Bassett, D., et al. (2012)</b> | <b>Practical challenges implementing national HIV testing guidelines in general medical admissions</b>                                     | Abstract                   | Record of HIV test                    | not reported                       | July 2011 (two weeks)                                                  | Acute medical admissions in central Manchester     | 1  | Acute medical admissions      | Record of HIV test administration                  |

|                                      |                                                                                                                                  |          |                                   |                                                                              |                                                                  |                                                                   |   |                                  |                                                        |
|--------------------------------------|----------------------------------------------------------------------------------------------------------------------------------|----------|-----------------------------------|------------------------------------------------------------------------------|------------------------------------------------------------------|-------------------------------------------------------------------|---|----------------------------------|--------------------------------------------------------|
| <b>Rosenvinge, M., et al. (2010)</b> | <b>A successful uptake of HIV testing in south London termination of pregnancy services</b>                                      | Abstract | Record of consent for an HIV test | Known HIV positive, recent (< 6 months) HIV negative test, repeat attendance | April - December 2009 (9 months)                                 | Women attending termination of pregnancy services in south London | 2 | Termination of pregnancy clinics | Paper and electronic record of HIV test administration |
| <b>Garrard, N., et al. (2010)</b>    | <b>Opt-out HIV testing pilot in termination of pregnancy services - 11-month service evaluation</b>                              | Abstract | HIV test recommendation           | not reported                                                                 | November 2008 - September 2009 (11 months)                       | Women attending termination of Pregnancy services north London    | 1 | Termination of pregnancy clinic  | Documentation of HIV test result                       |
| <b>Barbour, A., et al. (2011)</b>    | <b>Opt-out HIV testing policy implemented as routine standard of care for acute medical admissions in a high prevalence area</b> | Abstract | Record of HIV test                | <16 and >79 years,                                                           | July 2011 – December 2011 (6 months)                             | Patients attending acute medical admissions in Croydon            | 1 | Acute medical admissions         | HIV testing                                            |
| <b>Rycroft, J., et al. (2012)</b>    | <b>HIV testing in the acute medical unit - setting the scene for universal opt-out testing</b>                                   | Abstract | Laboratory record of HIV test     | Not reported                                                                 | June & November 2011 (audited 2 weeks for each admissions cycle) | Patients attending acute medical admissions in south east London  | 1 | Acute medical admissions         | Record of HIV test in laboratory database              |
| <b>Page, I., et al. (2011)</b>       | <b>The impact of new national HIV testing guidelines at a district general hospital in an area of high</b>                       | Paper    | Laboratory record of HIV test     | HIV test requests from GUM clinics                                           | October 2008 – September 2009                                    | Inpatients in Blackpool                                           | 1 | Secondary care hospital          | Laboratory record of HIV test                          |

|                                     |                                                                                                    |       |                               |              |                                          |                                       |   |                         |                               |
|-------------------------------------|----------------------------------------------------------------------------------------------------|-------|-------------------------------|--------------|------------------------------------------|---------------------------------------|---|-------------------------|-------------------------------|
|                                     | <b>HIV seroprevalence</b>                                                                          |       |                               |              |                                          |                                       |   |                         |                               |
| <b>Palfreman, A., et al. (2013)</b> | <b>HIV testing for acute medical admissions: evaluation of a pilot study in Leicester, England</b> | Paper | Laboratory record of HIV test | Not reported | September 2008 – August 2011 (36 months) | Patients admitted to AMU in Leicester | 1 | Secondary care hospital | Laboratory record of HIV test |

## References

1. Gupta ND, Lechelt M. **Assessment of the implementation and knowledge of the UK national guidelines for HIV testing (2008) in key conditions at a UK district general hospital.** International Journal of STD and AIDS 2011;22(2):102-04
2. Thomas William S, Taylor R, Barrett S, et al. **Changes in HIV testing rates among patients with tuberculosis in a large multi-ethnic city in the UK.** International Journal of STD and AIDS 2011;22(12):748-50
3. Hsu DTS, Ruf M, O'Shea S, et al. **Diagnosing HIV infection in patients presenting with glandular fever-like illness in primary care: are we missing primary HIV infection?** HIV Medicine 2013;14(1):60-63
4. Page I, Phillips M, Flegg P, et al. **The impact of new national HIV testing guidelines at a district general hospital in an area of high HIV seroprevalence.** Journal of the Royal College of Physicians of Edinburgh 2011;41(1):9-12
5. Thomson-Glover DM, Smalley L. **Diagnosing HIV in non-GUM secondary care settings.** HIV Medicine 2011;12(1):14-86
6. Thorburn F. **The impact of a multi-disciplinary meeting on the rates of HIV in testing in TB patients.** HIV Medicine 2012;13(1):1-11
7. Vas A, Morgan E, Padmankumar K, et al. **HIV testing in TB and Hepatitis services in a district general hospital.** HIV Medicine 2012;13(1):1-11
8. Byrne L, Whitburn T, Vearncombe S, et al. **HIV specialists must lead the way to make HIV testing truly routine.** HIV Medicine 2011;12(1):14-86
9. Manavi K, Gautam N. **Does identification of patients with HIV clinical indicator diseases lead to offer of HIV testing?** Evidence and resources to commission expanded HIV testing in priority medical services in high prevalence areas, Health Protection Agency 2012.
10. Dodd MC, Collini PJ, Dockrell DH. **Low concordance with HIV testing guidelines in a retrospective review of intensive care practice.** Thorax 2013;68(11):1072-4
11. Burns F, Edwards SG, Woods J, et al. **Acceptability and Feasibility of Universal Offer of Rapid Point of Care Testing for HIV in an Acute Admissions Unit: Results of the RAPID Project.** PLoS One 2012;7(4)
12. Chan SY, Hill-Tout R, Rodgers M, et al. **Acceptance of HIV testing in medical inpatients: a local acceptability study.** International Journal of STD & AIDS 2011;22(4):187-89
13. Rayment M, Thornton A, Mandalia S, et al. **HIV Testing in Non-Traditional Settings – The HINTS Study: A Multi-Centre Observational Study of Feasibility and Acceptability.** PLoS One 2012;7(6):e39530
14. Perry N, Heald L, Cassell J, et al. **HIV testing in acute general medical admissions must be universally offered to reduce undiagnosed HIV.** Health Protection Agency. Time to Test for HIV: Expanding HIV testing in healthcare and community services in England, 2011
15. Bryce N, Jeffery M, Hankins M, et al. **A study to assess the acceptability, feasibility and cost-effectiveness of universal HIV testing with newly registering patients (aged 16-59) in primary care.** Health Protection Agency. Time to Test for HIV: Expanding HIV testing in healthcare and community services in England, 2011
16. Ashby J, Braithewaite B, Walsh J, et al. **HIV testing uptake and acceptability in an inner city polyclinic.** AIDS Care 2012;24(7):905-09
17. Ellis S, Graham L, Price DA, Ong ELC. **Offering HIV testing in an acute medical admissions unit in Newcastle upon Tyne.** Clinical Medicine, Journal of the Royal College of Physicians of London 2011;11(6):541-43
18. Rudran B, Jarvis M, Thomas D, et al. **HIV testing in acute medical admissions.** HIV Medicine 2011;12(1):14-86
19. Leber W, McMullen H, Bremner S, et al. **Can point of care HIV testing in primary care increase identification of HIV? The RHIVA 2 cluster randomised controlled trial - update.** HIV Medicine 2012;13(1):1-11

20. Bassett D, Cousins D, Davies TL, et al. **Practical challenges implementing national HIV testing guidelines in general medical admissions.** HIV Medicine 2012;13(1):1-11
21. Rosenvinge M, Majewska W, Valcarcel E, et al. **A successful uptake of HIV testing in south London termination of pregnancy services.** HIV Medicine 2010;11(s1):1-119
22. Garrard N, Peck J, Ruf M, et al. **Opt-out HIV testing pilot in termination of pregnancy services - 11-month service evaluation.** HIV Medicine 2010;11(s1):1-119
23. Barbour A, Phillips S, Draper S, et al. **Opt-out HIV testing policy implemented as routine standard of care for acute medical admissions in a high prevalence area: effective and sustainable.** HIV Medicine 2012;13(1):1-11
24. Rycroft J, Hall R, Kegg S. **HIV testing in the Acute Medical Unit - setting the scene for universal opt-out testing.** HIV Medicine 2012;13(1):13-85
25. French S, Vieu MN, Peck J, et al. **Expanding new patient HIV testing in primary care in Lambeth, Southwark and Lewisham (LSL). Expanding access: HIV testing in extended settings.** Health Protection Agency. Time to Test for HIV: Expanding HIV testing in healthcare and community services in England, 2011
26. Tillet S, Orkin C, Nori A. **Introducing opt-out HIV testing in the Acute Admissions Unit: Experience of the first 2 months.** Expanding access: HIV testing in extended settings. PHAST, 2012.
27. Griffin A, Sarwar S, Shelton R, et al. **HIV, Hepatitis B and C testing in primary care.** Expanding access: HIV testing in extended settings. PHAST, 2012
28. Palfreeman A, Nyatsanza F, Farn H, et al. **HIV testing for acute medical admissions: evaluation of a pilot study in Leicester, England.** Sexually Transmitted Infections 2013;89(4):308-10
